# Supplementary material for: Enhanced Microwave Absorption Properties of α-Fe2O3-Filled Ordered Mesoporous Carbon Nanorods
Source: Materials (Basel). 2013 Apr 15;6(4):1520–9. doi: 10.3390/ma6041520 (PMC5452305; doi:10.3390/ma6041520)

## Supplementary Information

**Figure S1.** Two-port coaxial fixture used in measuring the complex scattering parameters ( $S_{11}$ ,  $S_{21}$ ).

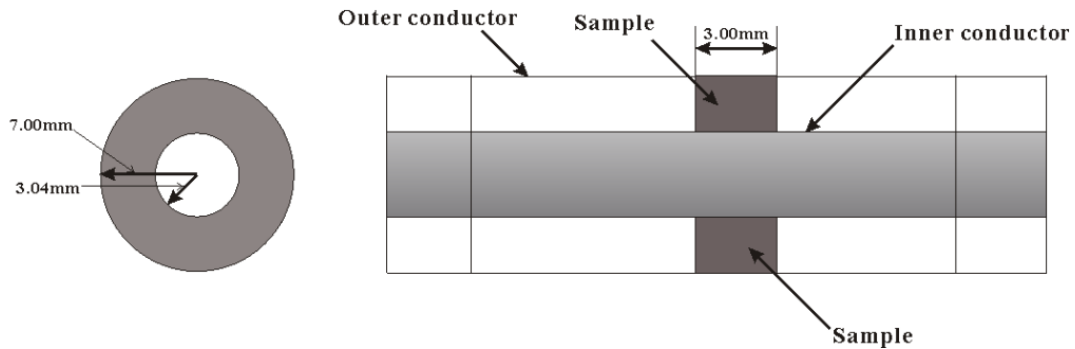

**Figure S2.** (a,b) *Cole-Cole* semicircles and (c,d) values of  $\mu''(\mu')^{-2}f^{-1}$  as a function of frequency for  $\alpha$ -Fe<sub>2</sub>O<sub>3</sub> microdendrites and OMC@ $\alpha$ -Fe<sub>2</sub>O<sub>3</sub> core-shell nanorods, respectively.

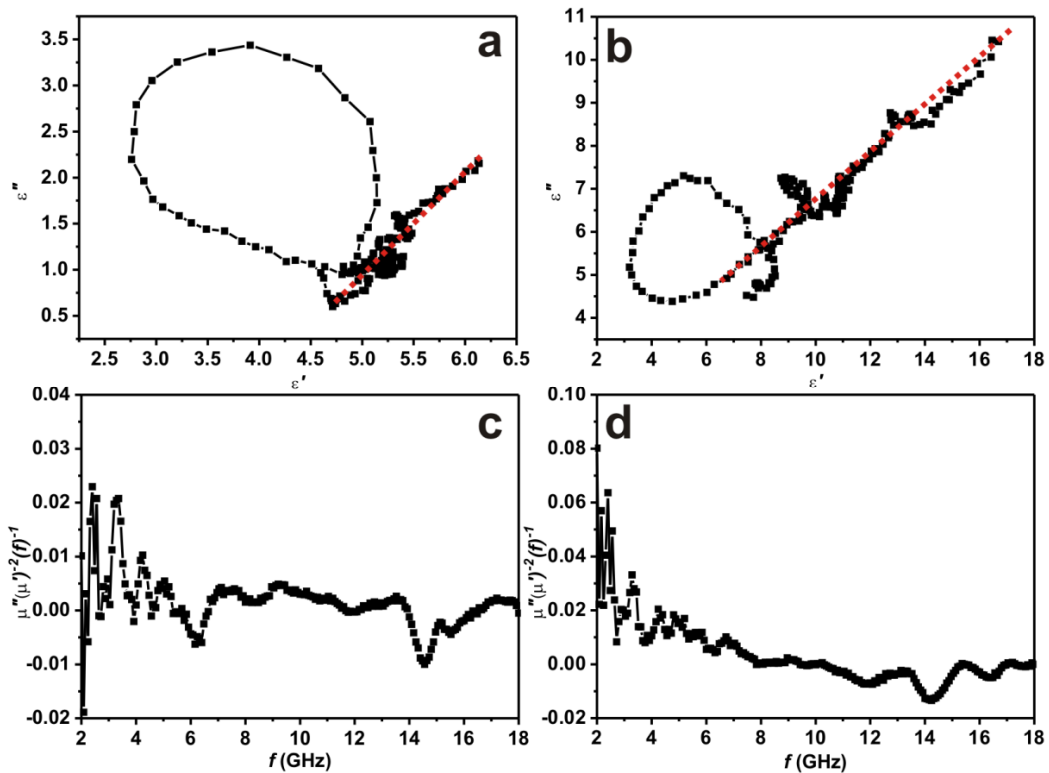

Supplement: Supplementary File 1 [file materials-06-01520-s001.pdf]
